# Supplementary material
Source: publisher site journal article supplement (https://www.dovepress.com/article/491929)
Supplement: Supplementary file 1 [file get_supplementary_file.php]

**Supplemental Table S1. Microorganisms Targeted by the M-PCR Assay**

| Microorganism | Bacterial  Cell Wall  (gram-negativea or gram-positivea) | Growth  (fastidiousb or  non-fastidiousb) | Classification  (classicalc or emergingc) |
| --- | --- | --- | --- |
| *Acinetobacter baumannii** | gram-negative | Non-fastidious | emerging |
| *Actinotignum schaalii* | gram-positive | fastidious | emerging |
| *Aerococcus urinae* | gram-positive | fastidious | emerging |
| *Alloscardovia omnicolens* | gram-positive | fastidious | emerging |
| *Candida albicans* | NA - yeast | NA - yeast | classical |
| *Candida auris* | NA - yeast | NA - yeast | classical |
| *Candida glabrata* | NA - yeast | NA - yeast | classical |
| *Candida parapsilosis* | NA - yeast | NA - yeast | classical |
| *Citrobacter freundii** | gram-negative | Non-fastidious | classical |
| *Citrobacter koseri** | gram-negative | Non-fastidious | classical |
| *Corynebacterium riegelii* | gram-positive | fastidious | emerging |
| *Enterococcus faecalis** | gram-positive | Non-fastidious | classical |
| *Enterococcus faecium* | gram-positive | Non-fastidious  fafafastidiousfastidious**  ** | classical |
| *Escherichia coli** | gram-negative | Non-fastidious | classical |
| *Gardnerella vaginalis* | gram-positive  or gram-negative | fastidious | emerging |
| *Klebsiella oxytoca** | gram-negative | Non-fastidious | classical |
| *Klebsiella pneumoniae** | gram-negative | Non-fastidious | classical |
| *Morganella morganii** | gram-negative | Non-fastidious | classical |
| *Mycoplasma hominis* | NA - no cell wall | fastidious | emerging |
| *Pantoea agglomerans** | gram-negative | Non-fastidious** | emerging |
| *Proteus mirabilis** | gram-negative | Non-fastidious | classical |
| *Providencia stuartii** | gram-negative | Non-fastidious | classical |
| *Pseudomonas aeruginosa** | gram-negative | Non-fastidious | classical |
| *Serratia marcescens** | gram-negative | Non-fastidious | classical |
| *Staphylococcus aureus** | gram-positive | Non-fastidious | classical |
| *Streptococcus agalactiae** | gram-positive | Non-fastidious | classical |
| *Ureaplasma urealyticum* | NA - No cell wall | fastidious | emerging |
| Coagulase-negative *Staphylococci* (CoNS)* [S*taphylococcus epidermidis, Staphylococcus haemolyticus, Staphylococcus lugdunenesis, Staphylococcus saprophyticus]* | gram-positive | Non-fastidious | emerging |
| Viridans group *Streptococci* (VGS) [S*treptococcus anginosus,* *Streptococcus oralis, Streptococcus pasteuranus]* | gram-positive | Non-fastidious | emerging |
| *Enterobacter* group*  [*Klebsiella aerogenes* (formally known as *Enterobacter aerogenes*), *Enterobacter cloacae*] | gram-negative | Non-fastidious | classical |

*When detected, will be followed up with P-AST

**Not included in P-AST

agram-positive vs gram-negative: gram-positive = bacteria that give a positive result in the Gram stain test, which uses crystal violet dye to categorize organisms based on the thickness of the peptidoglycan layer of the cell wall; gram-negative = bacteria that give a negative result in the Gram stain test

bfastidious vs non-fastidious: fastidious = microorganism that has complex or particular nutritional requirements; non-fastidious = microorganism with simple growth requirements met by standard urine culture conditions; non-fastidious = microorganism with simple growth requirements met by standard urine culture conditions

cclassical vs emerging: classical = pathogens traditionally associated with UTI; emerging = microorganisms being newly recognized as potential or confirmed uropathogens
